# Supplementary material
Source: PubMed Central journal article supplement (PMC1948902)

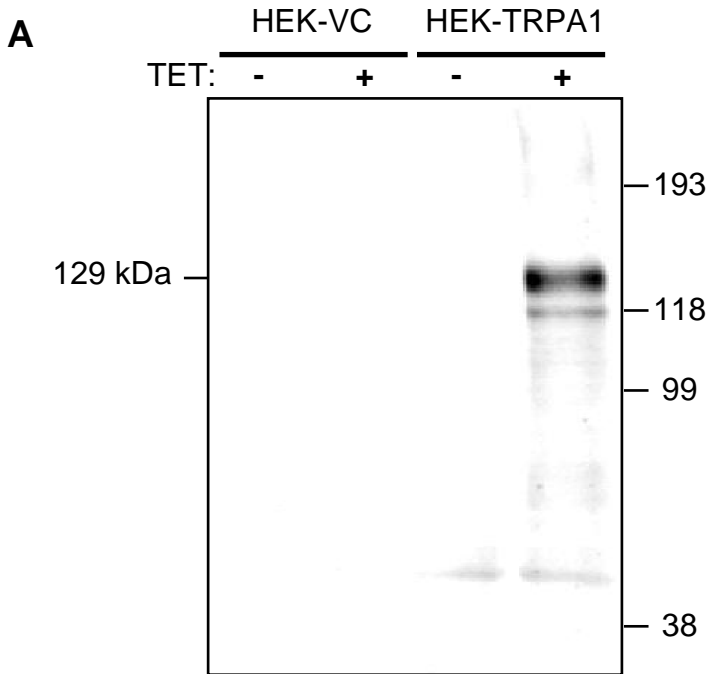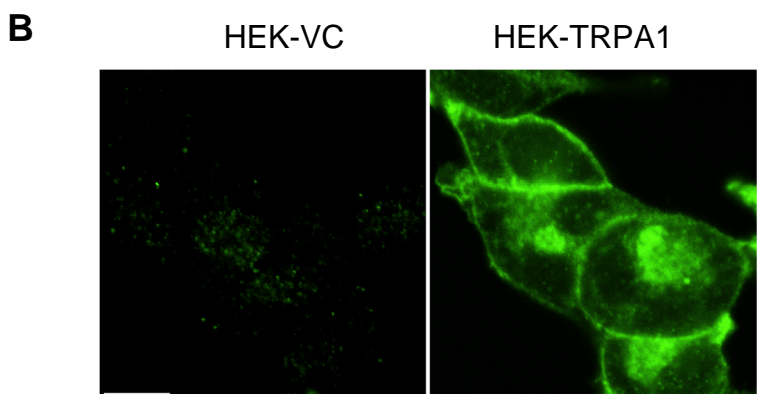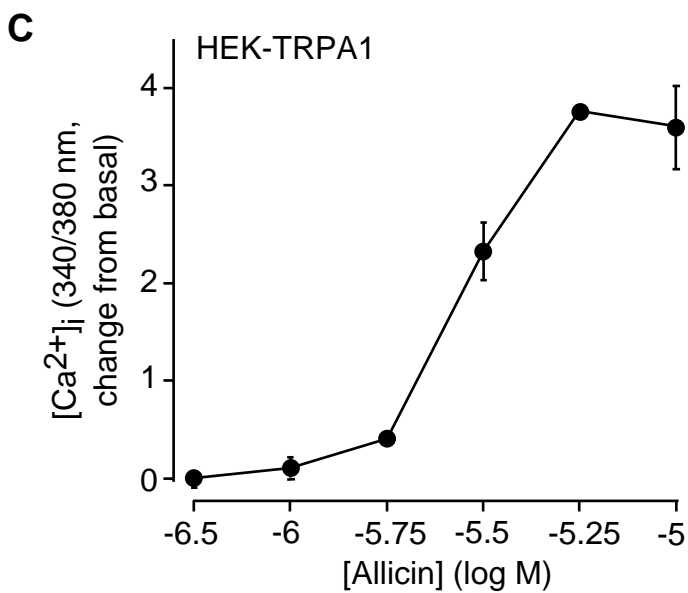

Supplement: pnas_0705923104_1.pdf [file pnas_0705923104_1.pdf]

# Capsaicin

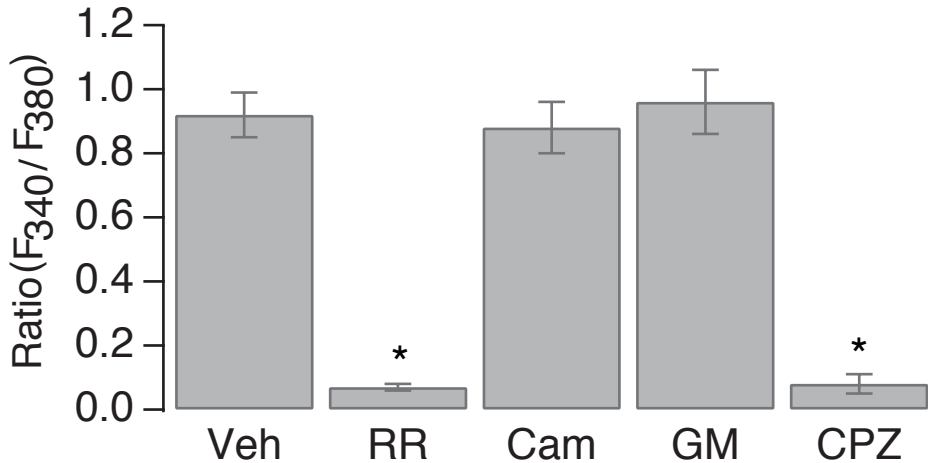

Supplement: pnas_0705923104_2.pdf [file pnas_0705923104_2.pdf]
